# Supplementary material
Source: publisher figshare collection journal article supplement (https://frontiersin.figshare.com/ndownloader/files/26871722)
Supplement: Supplementary file [file 26871722]

## Appendix

**Table A.1:** The comparisons of the basic approach and the *ATP* approach

|                          | The basic approach                                                                                                  | The <i>ATP</i> approach                                                                                                                                                                                                                                                   |
|--------------------------|---------------------------------------------------------------------------------------------------------------------|---------------------------------------------------------------------------------------------------------------------------------------------------------------------------------------------------------------------------------------------------------------------------|
| Definition of <i>CHE</i> | Spending for health care exceeds a certain level of a household's entire budget                                     | Health spending exceeds the threshold of a household's ability to pay for health care                                                                                                                                                                                     |
| Numerator                | <i>OOP</i> expenses                                                                                                 | <i>OOP</i> expenses                                                                                                                                                                                                                                                       |
| Denominator              | Total income<br>Total consumption<br>Total expenditure                                                              | Household total expenditure minus actual food spending<br>Household total expenditure minus a standard amount representing subsistence food spending<br>Household total expenditure minus a standard amount representing subsistence spending on food, rent and utilities |
| Advantage                | (1) Easy to understand and calculate.<br>(2) Not depend on household allocation decisions across consumption items. | Distinguish between the rich and poor.                                                                                                                                                                                                                                    |
| Limitation               | (1) Fail to distinguish the poor and the rich.<br>(2) Underestimate the poverty.<br>(3) Ignore financing means.     | (1) Fail to tell that how far <i>OOP</i> expenses eat into resources required for necessities.<br>(2) Ignore financing means.<br>(3) Income data is unavailable in low and middle income countries.                                                                       |

**Table A.2:** Variable definitions

| Variable                             | Description                                                                                                                               |
|--------------------------------------|-------------------------------------------------------------------------------------------------------------------------------------------|
| <i>Hospitalization</i>               | Dummy that equals to one if there is a member of a family being hospitalized in the previous year, otherwise it equals to 0               |
| <i>Ln inpatient medical expenses</i> | The logarithm of household inpatient medical expenses                                                                                     |
| <i>Agency</i>                        | The number of hospitals in the province                                                                                                   |
| <i>Bed</i>                           | The number of beds in the hospitals in the province                                                                                       |
| <i>Urban</i>                         | Dummy that equals to one if the individual lives in urban areas, otherwise it equals to 0                                                 |
| <i>Family number</i>                 | The number of family members                                                                                                              |
| <i>Ln income</i>                     | The logarithm of the household income                                                                                                     |
| <i>Insurance</i>                     | The number of people in a family with basic social medical insurance                                                                      |
| <i>Age</i>                           | The age of the family financial respondent                                                                                                |
| <i>Marriage status</i>               | The marriage status of the financial respondent was divided into single, divorced, married, widowed and cohabitation                      |
| <i>Health condition</i>              | The health condition of the financial respondent is self-assessed on a five-point scale, ranging from "The worst" (-2) to "The best" (+2) |

**Table A.3:** Data description (2010)

| Variable                                 | Obs   | Mean      | Std. Dev. | Min  | Max      |
|------------------------------------------|-------|-----------|-----------|------|----------|
| <b><i>Hospitalization</i></b>            | 7,579 | 0.1735057 | 0.3787089 | 0    | 1        |
| <b><i>Inpatient medical expenses</i></b> | 7,579 | 1,642.721 | 7,109.463 | 0    | 200,000  |
| <b><i>Agency</i></b>                     | 7,579 | 874.4276  | 343.7654  | 277  | 1377     |
| <b><i>Bed (Ten thousands)</i></b>        | 7,579 | 15.30977  | 5.603493  | 4.04 | 25.58    |
| <b><i>Urban</i></b>                      | 7,579 | 0.5515239 | 0.497371  | 0    | 1        |
| <b><i>Family number</i></b>              | 7,579 | 3.50376   | 1.569732  | 1    | 15       |
| <b><i>Ln income</i></b>                  | 7,579 | 9.958263  | 1.199798  | 0    | 13.60726 |
| <b><i>Insurance</i></b>                  | 7,579 | 1.964903  | 1.277155  | 0    | 10       |
| <b><i>Age</i></b>                        | 7,579 | 50.72714  | 12.8005   | 17   | 97       |
| <b><i>Marriage status</i></b>            |       |           |           |      |          |
| Single                                   | 171   |           |           |      |          |
| Divorced                                 | 192   |           |           |      |          |
| Married                                  | 6,682 |           |           |      |          |
| Widowed                                  | 504   |           |           |      |          |
| Cohabitation                             | 30    |           |           |      |          |
| <b><i>Health condition</i></b>           |       |           |           |      |          |
| -2                                       | 159   |           |           |      |          |
| -1                                       | 494   |           |           |      |          |
| 0                                        | 643   |           |           |      |          |
| 1                                        | 3,009 |           |           |      |          |
| 2                                        | 3,274 |           |           |      |          |

**Table A.4:** Data description (2014)

| Variable                             | Obs    | Mean      | Std. Dev. | Min      | Max      |
|--------------------------------------|--------|-----------|-----------|----------|----------|
| <i>Hospitalization</i>               | 10,080 | 0.230754  | 0.4213362 | 0        | 1        |
| <i>Inpatient medical expenses</i>    | 10,080 | 3,404.887 | 14,328.4  | 0        | 520,000  |
| <i>Ln inpatient medical expenses</i> | 2,326  | 8.828464  | 1.210692  | 5.010635 | 13.16158 |
| <i>Agency</i>                        | 10,080 | 1,021.303 | 438.6881  | 161      | 1854     |
| <i>Bed (Ten thousands)</i>           | 10,080 | 20.90744  | 9.254966  | 3        | 36       |
| <i>Urban</i>                         | 10,080 | 0.4837302 | 0.49976   | 0        | 1        |
| <i>Family number</i>                 | 10,080 | 3.768254  | 1.796432  | 1        | 17       |
| <i>Ln income</i>                     | 10,080 | 10.45733  | 1.001489  | 0        | 15.26726 |
| <i>Insurance</i>                     | 10,080 | 2.1375    | 1.182496  | 0        | 9        |
| <i>Age</i>                           | 10,080 | 49.69902  | 13.97626  | 16       | 92       |
| <i>Marriage status</i>               |        |           |           |          |          |
| <i>Single</i>                        | 447    |           |           |          |          |
| <i>Divorced</i>                      | 239    |           |           |          |          |
| <i>Married</i>                       | 8,680  |           |           |          |          |
| <i>Widowed</i>                       | 662    |           |           |          |          |
| <i>Cohabitation</i>                  | 52     |           |           |          |          |
| <i>Health condition</i>              |        |           |           |          |          |
| <i>-2</i>                            | 1,797  |           |           |          |          |
| <i>-1</i>                            | 1,621  |           |           |          |          |
| <i>0</i>                             | 3,750  |           |           |          |          |
| <i>1</i>                             | 1,712  |           |           |          |          |
| <i>2</i>                             | 1,200  |           |           |          |          |

**Table A.5:** Estimates of the regression models (2014)

|                         | <b>Hospitalization</b>       | <b>Ln inpatient medical expenses</b> |
|-------------------------|------------------------------|--------------------------------------|
| <b>Agency</b>           |                              | -0.0004446***<br>(0.0001223)         |
| <b>Bed</b>              |                              | 0.0182864***<br>(0.0059627)          |
| <b>Urban</b>            | 0.1811973 ***<br>(0.0529236) | 0.1920981***<br>(0.0541036)          |
| <b>Family number</b>    | 0.0277184<br>(0.0172121)     | -0.0362305**<br>(0.0181957)          |
| <b>Ln income</b>        | -0.0649381 **<br>(0.0283993) | 0.1207951**<br>(0.0290366)           |
| <b>Insurance</b>        | 0.3779734 ***<br>(0.0251204) | 0.0736707***<br>(0.0261489)          |
| <b>Age</b>              | 0.0162383 ***<br>(0.0021592) | 0.0111022***<br>(0.0019725)          |
| <b>Marriage status</b>  |                              |                                      |
| Divorced                | 0.4853371 **<br>(0.2226117)  | -0.0426169<br>(0.2411069)            |
| Married                 | 0.1899185<br>(0.1599719)     | -0.0559939<br>(0.1809888)            |
| Widowed                 | -0.1830898<br>(0.191195)     | -0.4033614*<br>(0.2123892)           |
| Cohabitation            | 0.0257<br>(0.4208557)        | -0.3493461<br>(0.3956593)            |
| <b>Health condition</b> |                              |                                      |
| 2                       | -0.3068183***<br>(0.0901855) | -0.0018289<br>(0.0899121)            |
| 1                       | -0.4184451***<br>(0.0812338) | 0.1342498<br>(0.0864674)             |
| -1                      | 0.0669768<br>(0.0723347)     | 0.1106135<br>(0.071394)              |
| -2                      | 0.7321299***<br>(0.0668217)  | 0.2965411***<br>(0.0646634)          |
| <b>C</b>                | -2.626715***<br>(0.3429847)  | 6.886184***<br>(0.3545954)           |
